# Supplementary material for: Natural selection and genetic diversity of domain I of Plasmodium falciparum apical membrane antigen-1 on Bioko Island
Source: Springer Nature journal article supplement (doi:10.1186/s12936-019-2948-y), 2019-09-18
Supplement: MOESM1 [file 17185390]

|               |   |   |   |   |   |   |   |   |   |   |   |   |   |   |   |   |   |   |
|---------------|---|---|---|---|---|---|---|---|---|---|---|---|---|---|---|---|---|---|
| Haplotype_99  | K | E | D |   | I | D | L | L | E | D | N | Y | E | Q | K | L | E |   |
| Haplotype_100 |   |   | D | K | I | D | D | N | E | N | Q | Y |   | Q | K |   |   |   |
| Haplotype_101 |   | E | D |   |   |   |   |   | E |   |   |   |   | Q | K |   |   |   |
| Haplotype_102 | K |   | D |   | I | D | D | N | E | N | Q | Y |   | Q | K |   |   |   |
| Haplotype_103 |   |   | D |   | I | G | D | N | E | N | Q | Y |   | Q | K |   |   |   |
| Haplotype_104 |   | E | D |   |   | Q |   |   | E | N |   |   |   | Q | K |   |   |   |
| Haplotype_105 |   |   | D | K | I | D | D | N | E | N |   |   |   | Q | K |   |   |   |
| Haplotype_106 | K |   | D | K | I | N | G | L | N | E | N | Y |   | Q | K |   |   |   |
| Haplotype_107 | K | E | D |   | I | N | G | D | N | E | N | Q |   | Q | K |   |   |   |
| Haplotype_108 | K |   | D |   | I | G | D | N | E | N | Q | Y |   | Q | K |   |   |   |
| Haplotype_109 |   | E | D | N | I | N | G | K | D | E | D | N | E | Y |   | K |   |   |
| Haplotype_110 | K | E | D |   |   | D | R |   | E | N |   | N |   |   | K |   |   |   |
| Haplotype_111 |   | K | D | N | N | G | K | D | E | N | E |   |   |   | K |   |   |   |
| Haplotype_112 | K | E | D | N | P | N | G | D | L | N | E | N | K | E | Y |   | K |   |
| Haplotype_113 |   | E |   |   |   | Q |   |   |   |   |   |   |   | Q | K |   |   |   |
| Haplotype_114 | K |   | D | K | I | D | D | N | E | N | Q | Y |   | Q | K | L |   |   |
| Haplotype_115 | K | E | D | K |   | D | L | L | E | D |   |   |   |   |   | K | L | E |
| Haplotype_116 | K | E | D | N | P | Q |   |   |   |   |   |   |   |   |   | K | L | E |
| Haplotype_117 |   | E | D | N | P | N | G | D | N | E | N |   | N |   |   | K |   |   |
| Haplotype_118 | K |   | D | K | I | N | G | D | N | E | N | Q | Y | Q | K |   |   |   |
| Haplotype_119 |   |   | D | K | I | N | G | D | N | E | N | Y |   | Q | K |   |   |   |
| Haplotype_120 |   | E | D | K | I | G | L | N | E | N | Y |   |   | Q | K |   |   |   |
| Haplotype_121 | K | E | D | N | P | D | L | L | E | D | N |   |   | Q | K | L | E |   |
| Haplotype_122 |   | K | D | N | I | H | D | N | E | N | E | Y |   |   | K | L | H | E |
| Haplotype_123 |   |   | D | K | I | N | G | D | N | E | N | Q | Y | Q | K |   |   |   |
| Haplotype_124 |   | K | D | N | I | N | G | K | D | L | E | D | N | K | E | Y |   | K |
| Haplotype_125 |   | K | D | N | I | H | D | S | N | E | N | E | Y | Q | K |   | E |   |
| Haplotype_126 | K | E | D | K |   | D | D | L | N | E | N | Y | E |   |   |   |   |   |
| Haplotype_127 |   | K | D | N | I | H | D | K | E | N | E | Y |   | Q | E |   | H |   |
| Haplotype_128 |   | E | D | K |   | H | D | N |   | N |   | N |   |   |   |   |   |   |
| Haplotype_129 |   | E | D | K |   | H | D | N | E | N |   |   |   |   | K |   |   |   |
| Haplotype_130 |   | E | D |   |   | Q |   |   |   |   | Y |   |   | Q | K |   |   |   |
| Haplotype_131 |   | E | D |   |   | Q |   |   |   |   |   |   |   | Q | I | K |   |   |
