# Supplementary material for: Natural selection and genetic diversity of domain I of Plasmodium falciparum apical membrane antigen-1 on Bioko Island
Source: Springer Nature journal article supplement (doi:10.1186/s12936-019-2948-y), 2019-09-18

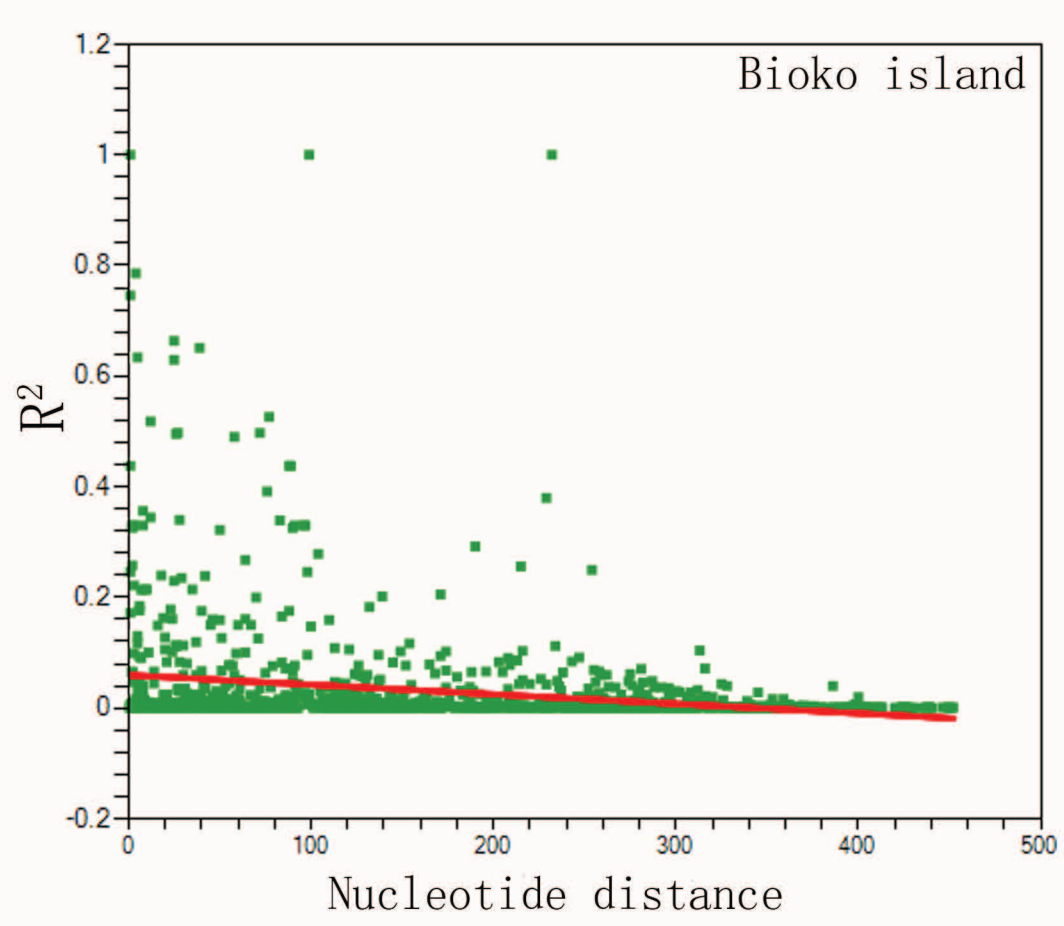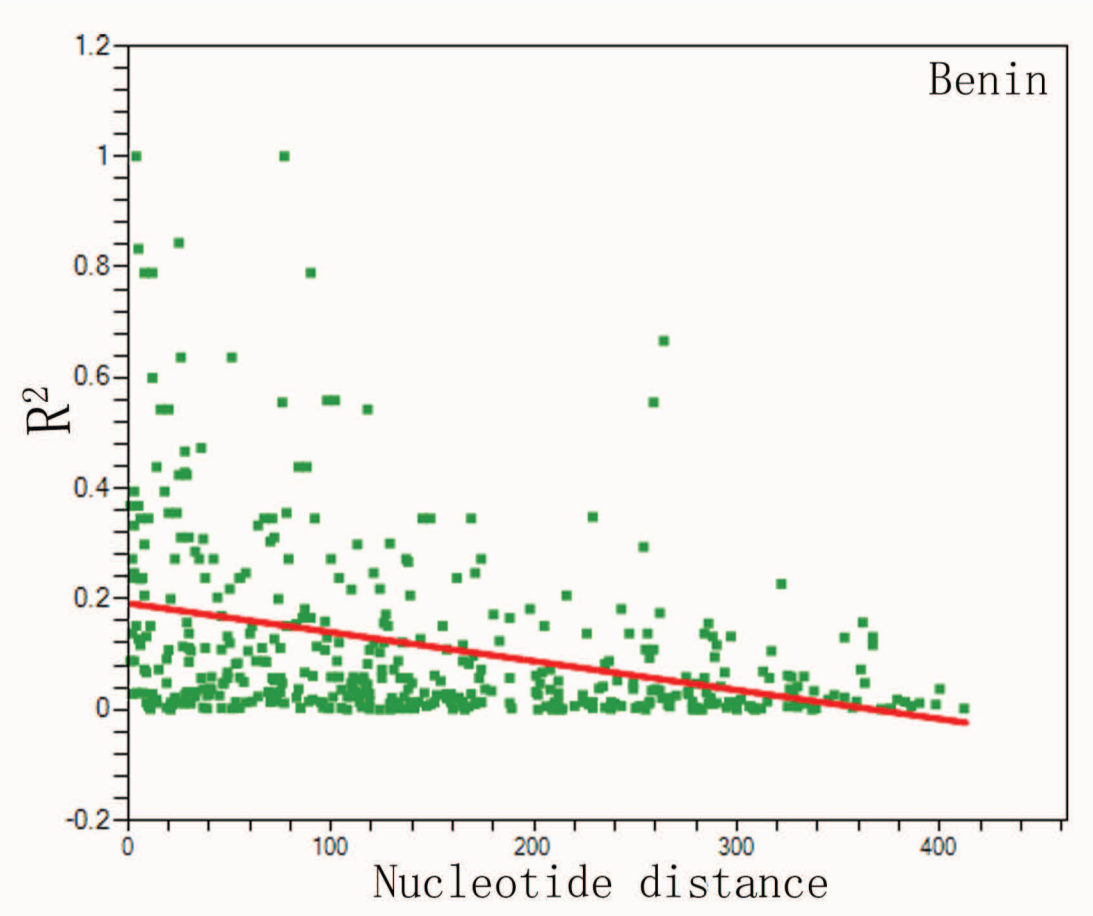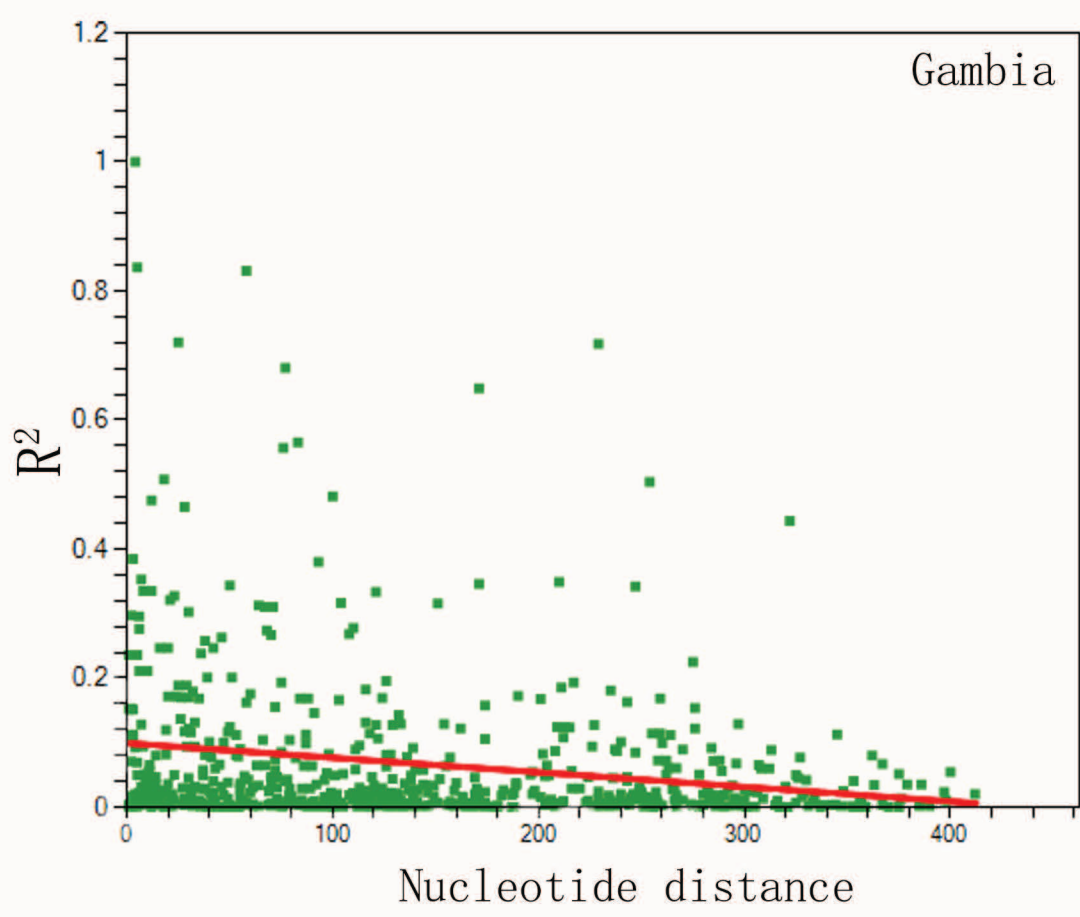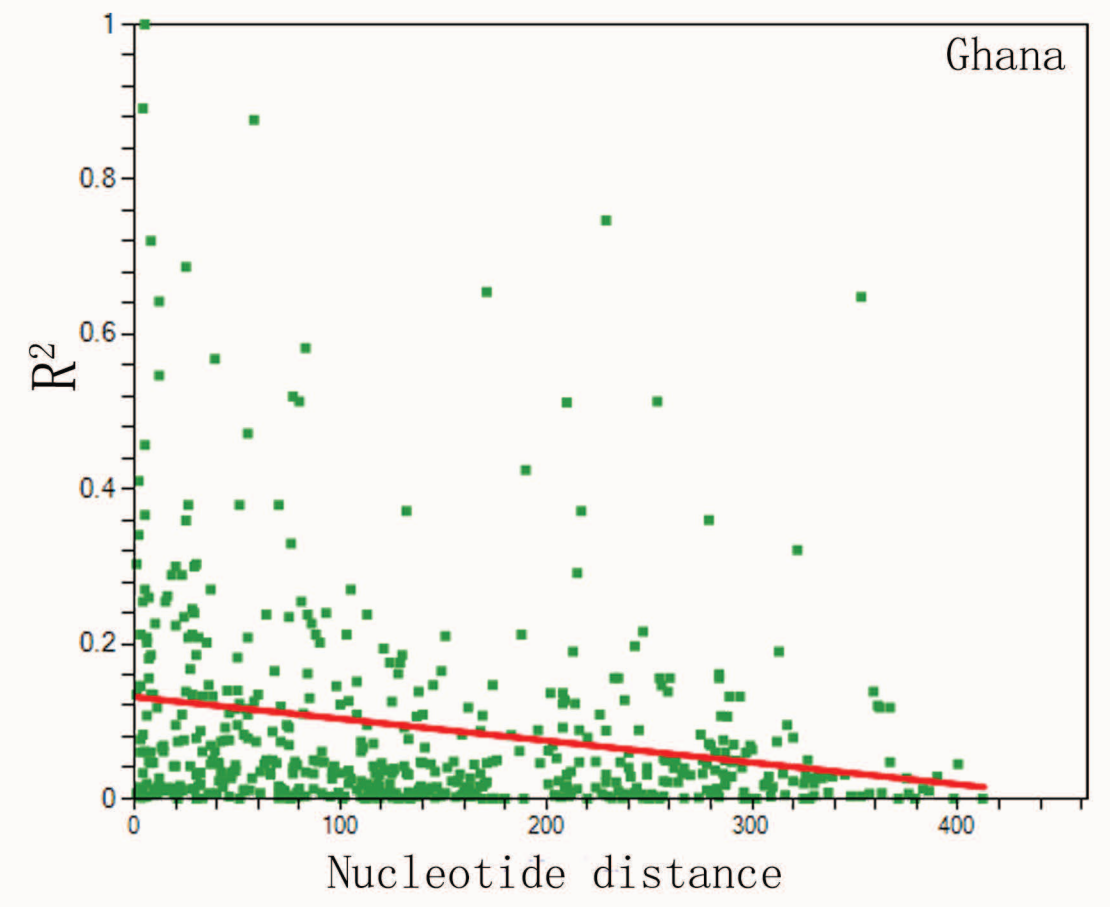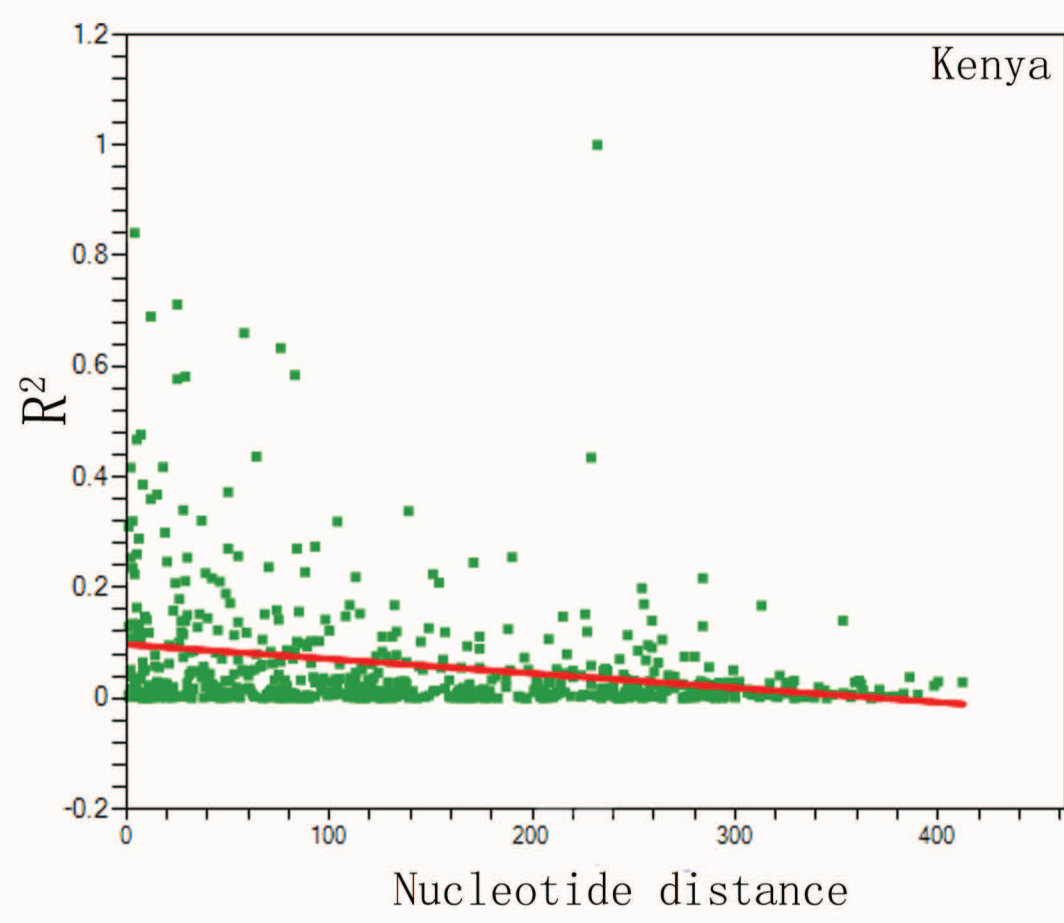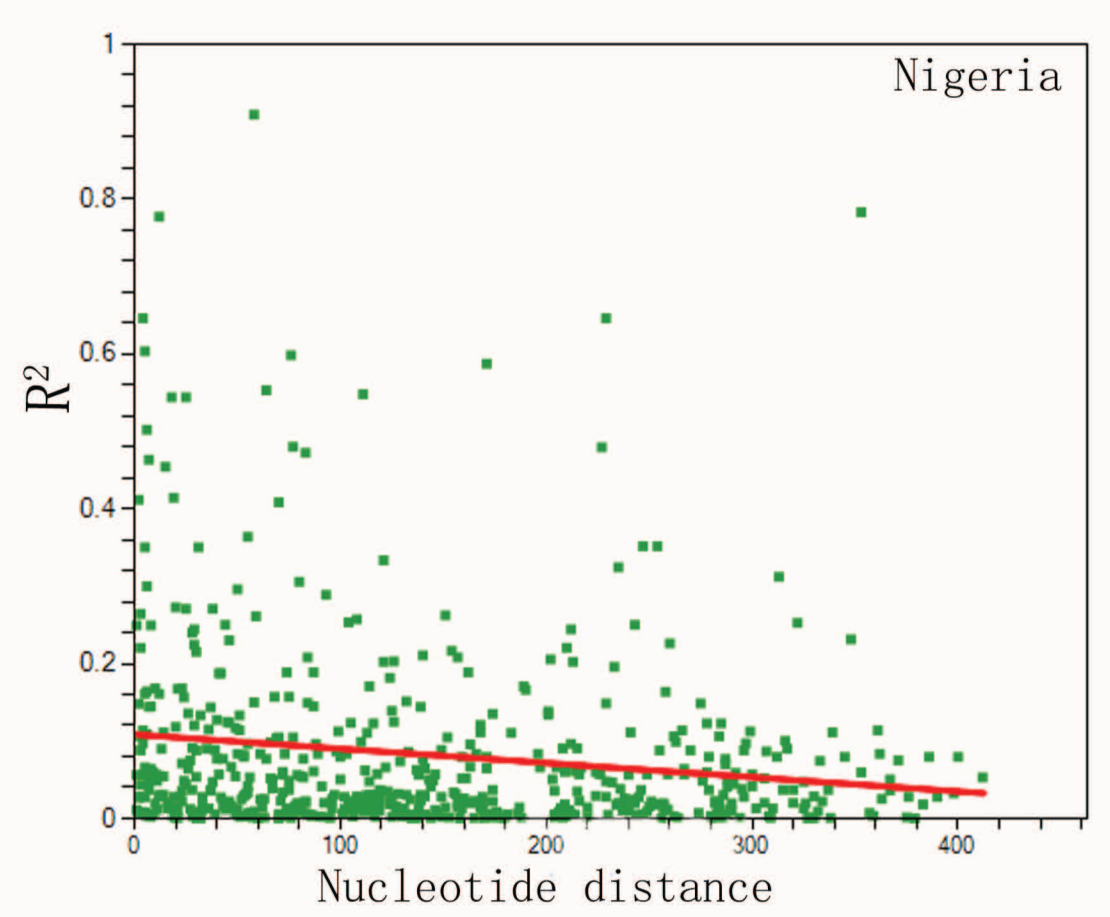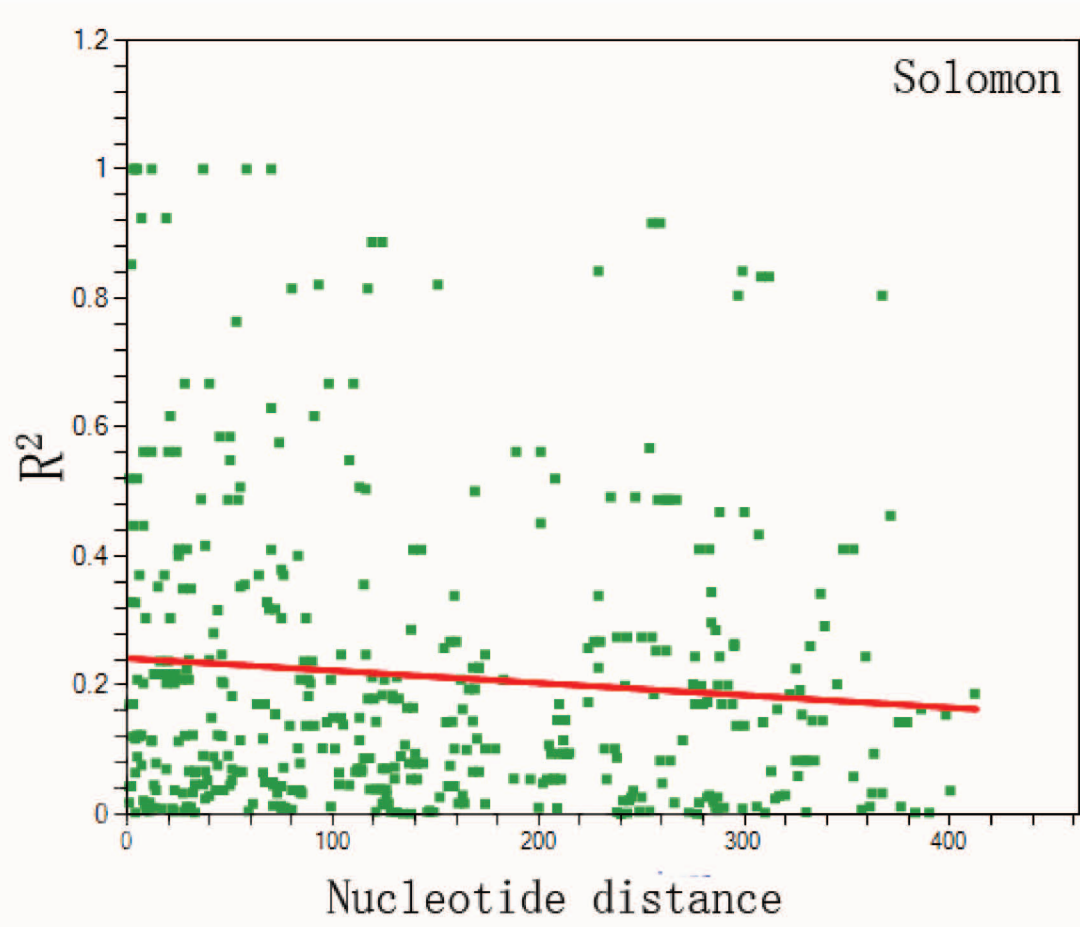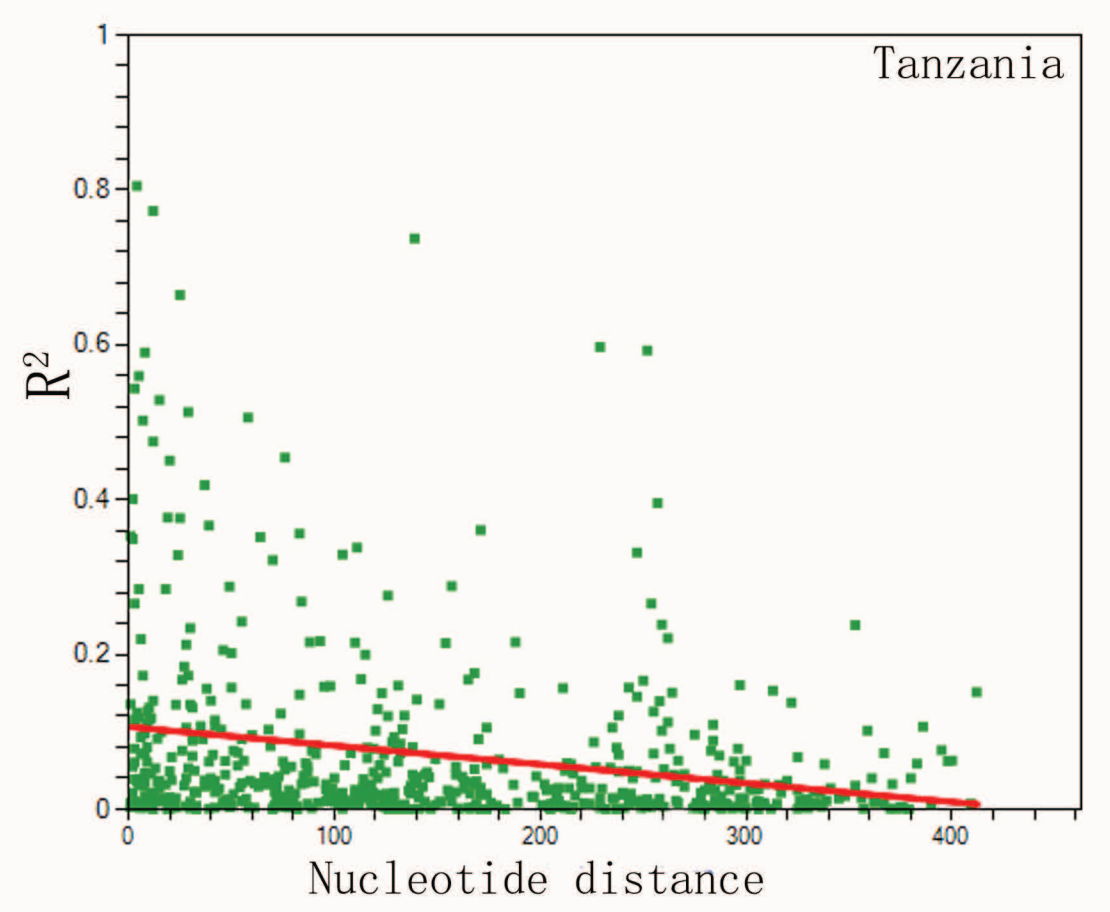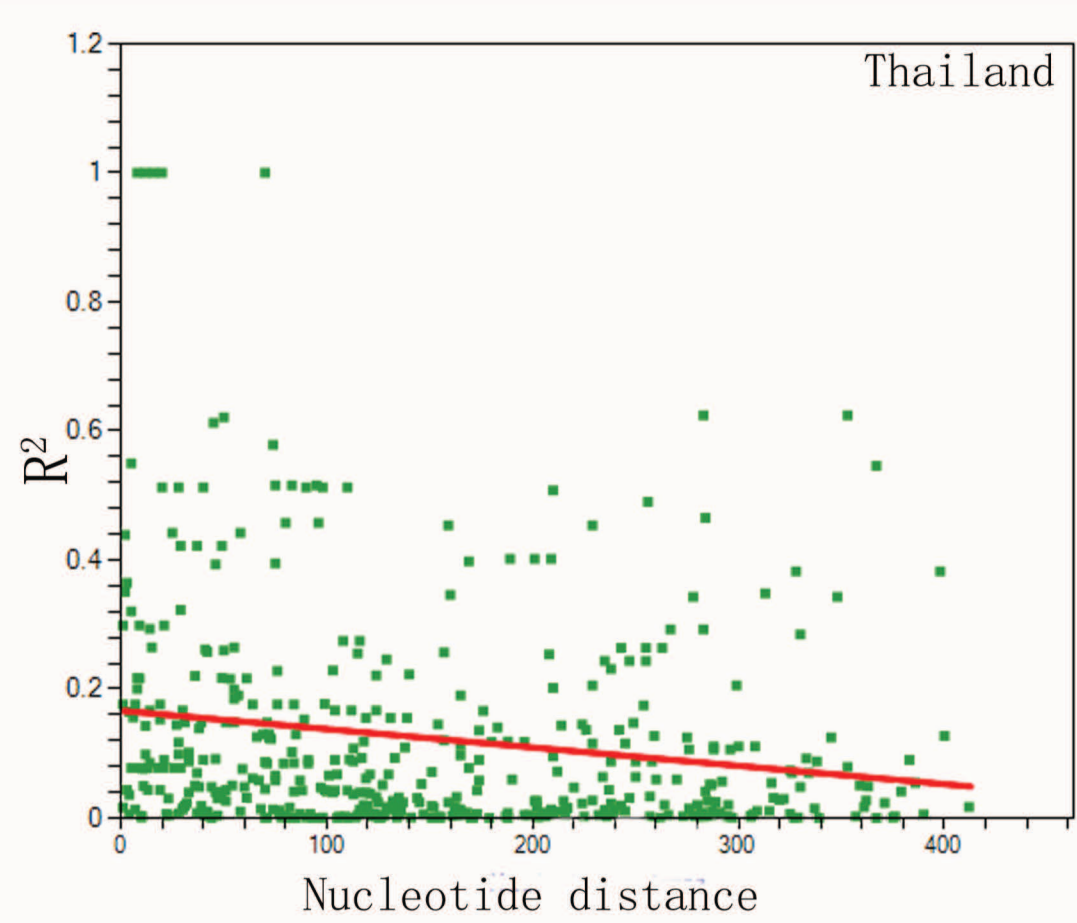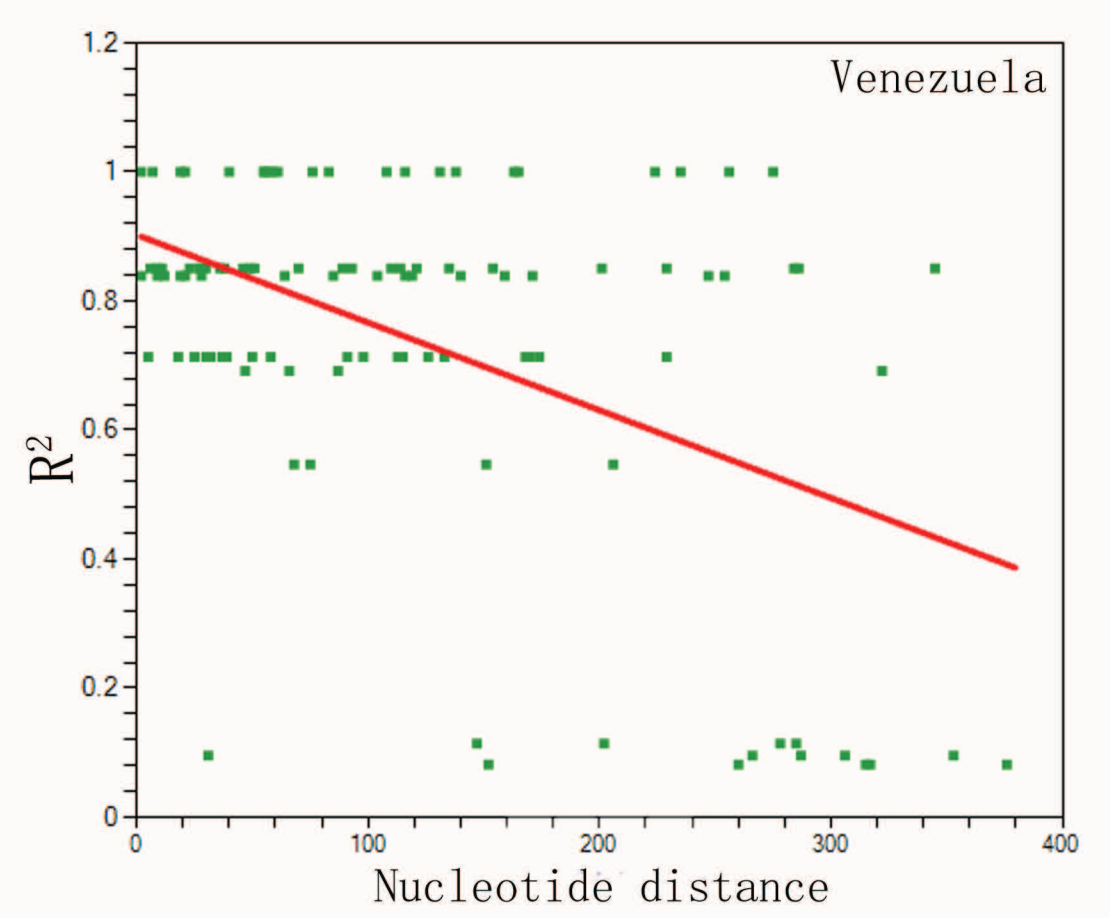

Supplement: MOESM2 [file 17185390]
